# Supplementary material
Source: ML conference proceedings conference paper supplement (https://openreview.net/forum?id=EykfhjYrM0)

0

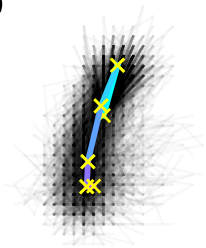

1

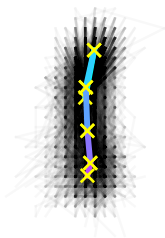

2

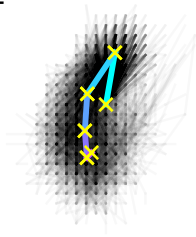

3

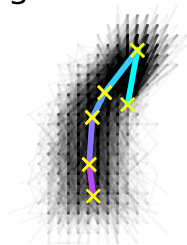

4

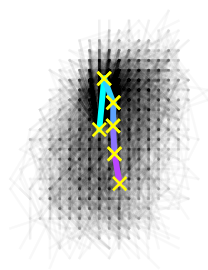

5

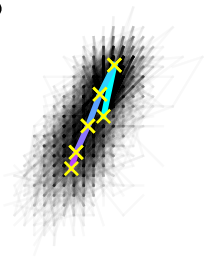

6

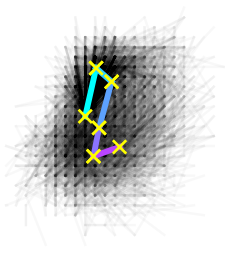

7

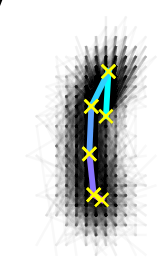

8

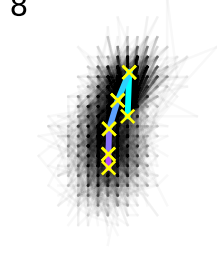

9

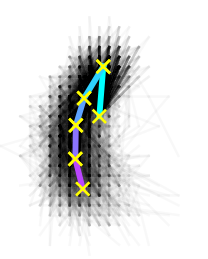

Supplement: supplementary_material [file attachment]

# Glimpse Accuracy

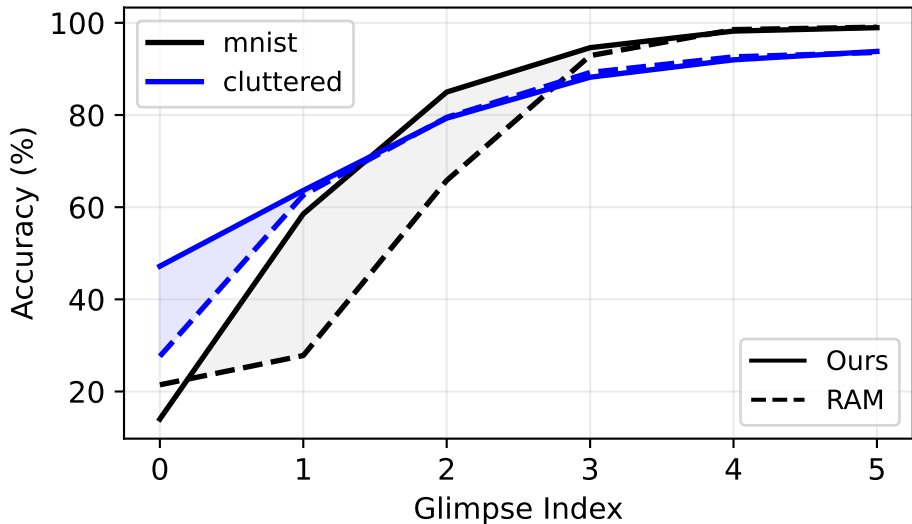

Supplement: supplementary_material [file attachment]

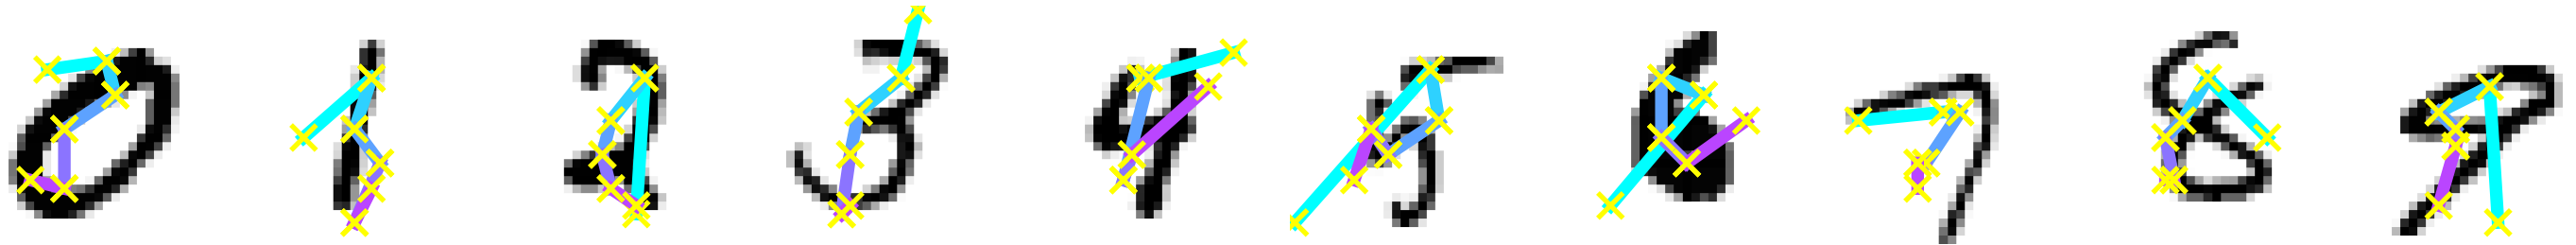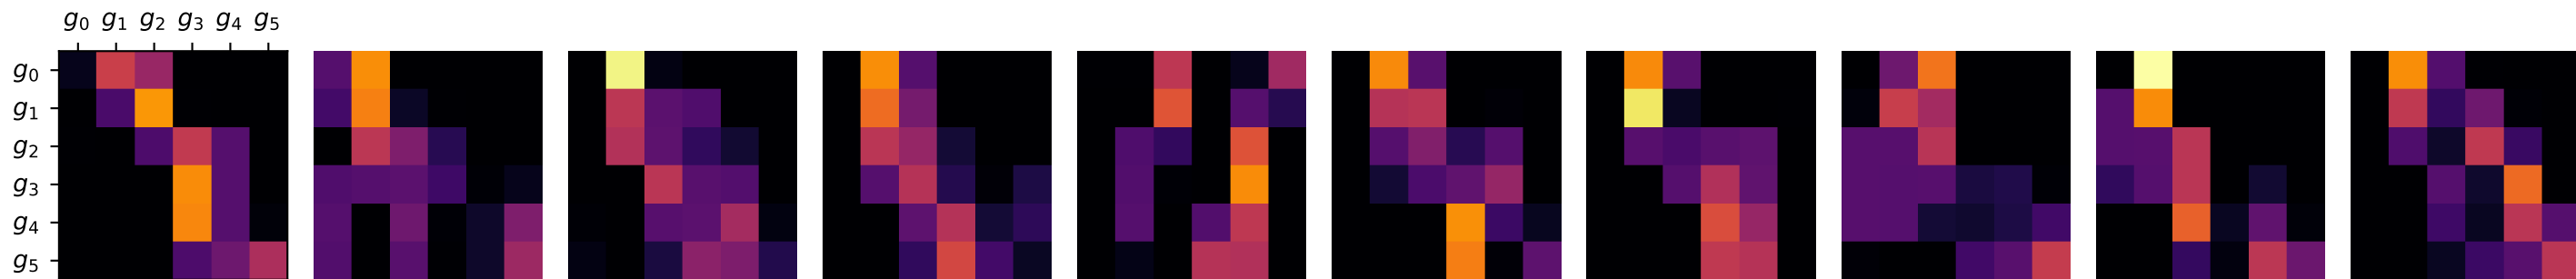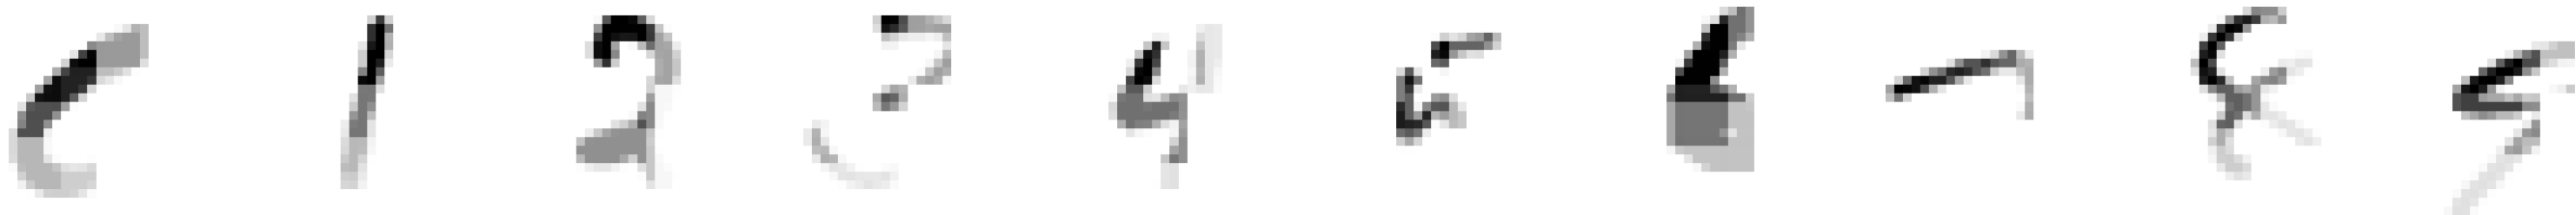

Supplement: supplementary_material [file attachment]

0

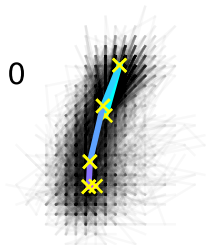

1

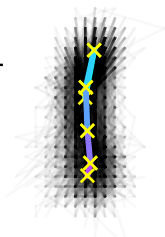

2

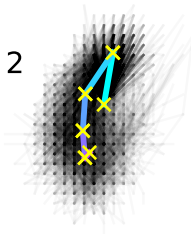

3

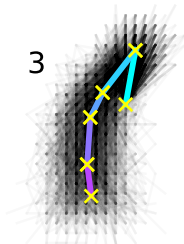

4

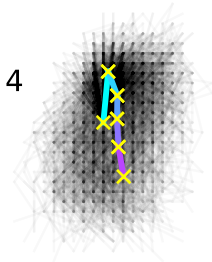

5

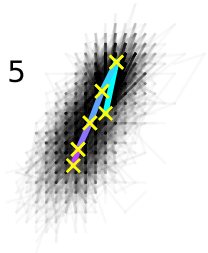

6

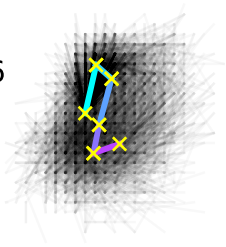

7

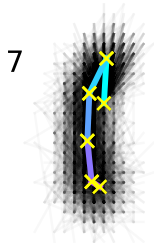

8

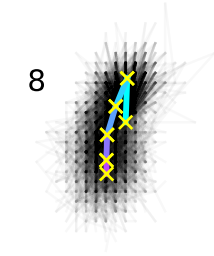

9

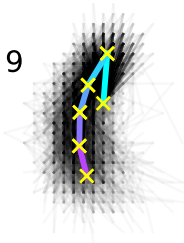

Supplement: supplementary_material [file attachment]

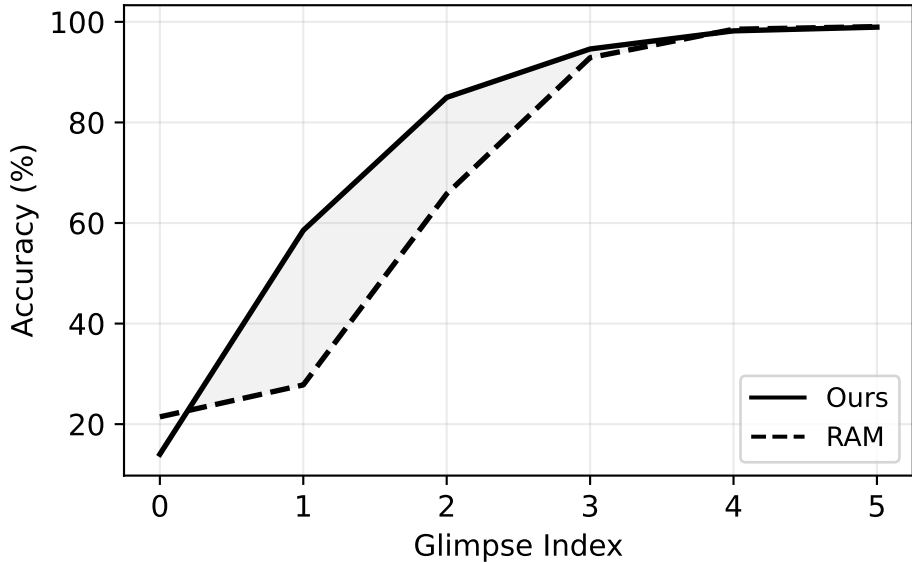

Supplement: supplementary_material [file attachment]

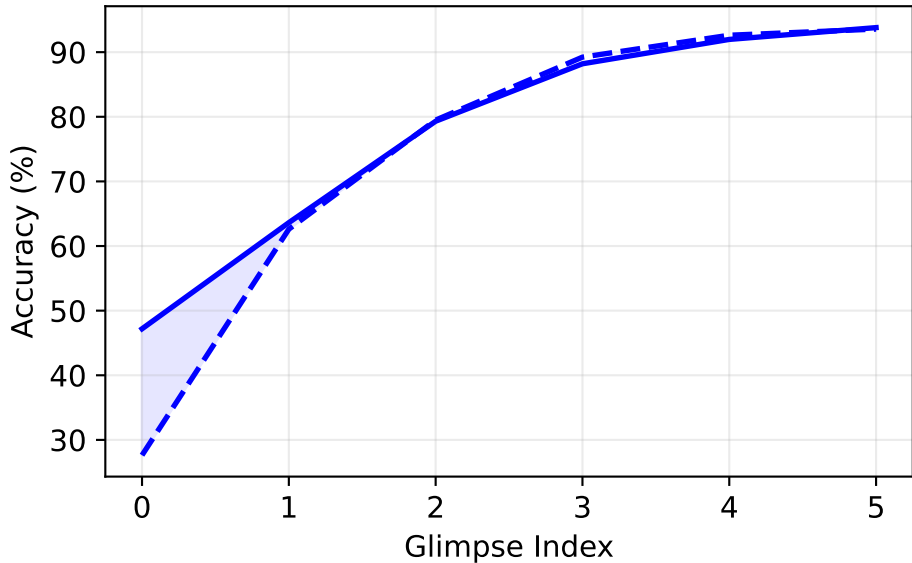

Supplement: supplementary_material [file attachment]

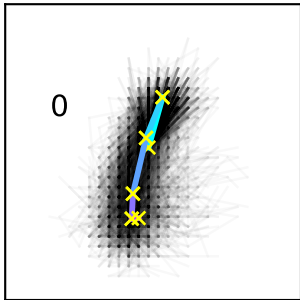

1

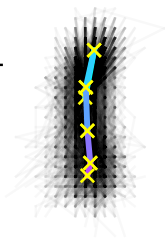

2

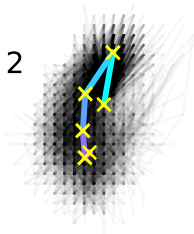

3

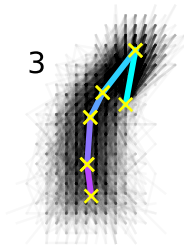

4

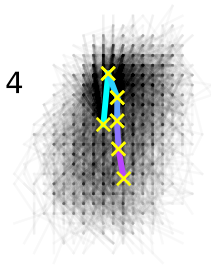

5

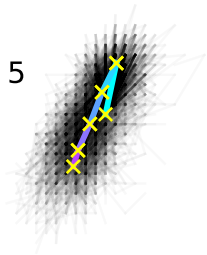

6

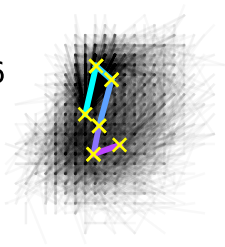

7

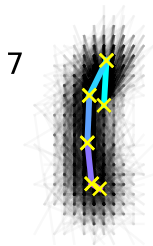

8

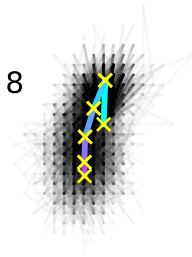

9

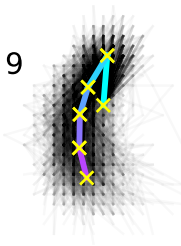

Supplement: supplementary_material [file attachment]
